# Supplementary material for: Indole-4-carboxaldehyde Isolated from Seaweed, Sargassum thunbergii, Attenuates Methylglyoxal-Induced Hepatic Inflammation
Source: MDPI journal article supplement (doi:10.3390/md17090486), 2019-08-21
Supplement: s1 [file s1]

# Supplementary date

## Indole-4-carboxaldehyde Isolated from Seaweed, *Sargassum thunbergii*, Attenuates Methylglyoxal-Induced Hepatic Inflammation

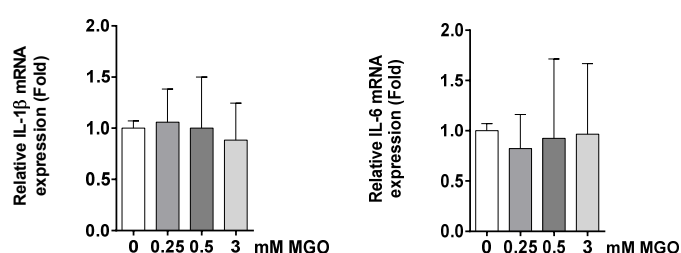

Supplementary figure 1. MGO was not induced IL-1 $\beta$  and IL-6 cytokines mRNA expression.
